# Supplementary material for: Near-infrared-light pre-treatment attenuates noise-induced hearing loss in mice
Source: PeerJ. 2020 Jun 17;8:e9384. doi: 10.7717/peerj.9384 (PMC7305775; doi:10.7717/peerj.9384)
Supplement: Supplemental Information 2 — The table show the amplitude growth functions of auditory brainstem response wave IV and the seperated slope of the function for each measurement. [file peerj-08-9384-s002.xlsx]

## Sheet: noise only - functions
Mouse ABR analysis - all amplitude slopes - noise only
pre	5 kHz	animal number	wave 4		post	5 kHz	animal number	wave 4
		28	y = 0,0613x - 0,9407				28	y = 0,0642x - 1,7505
		45	y = 0,0905x - 1,852				45	y = 0,016x - 0,2967
		55	y = 0,0861x - 1,3224				55	y = 0,0328x - 0,529
		59	y = 0,1185x - 2,1002				59	y = 0,0212x + 0,3548
		62	-				62	-
		66	y = 0,1242x - 1,6735				66	y = 0,053x - 1,2202
		67	y = 0,0658x + 1,6027				67	y = -0,0065x + 0,7784
	10 kHz	animal number	wave 4			10 kHz	animal number	wave 4
		28	y = 0,0823x - 1,8617				28	y = 0,039x - 0,5144
		45	y = 0,1242x - 3,3461				45	y = 0,066x - 2,16
		55	y = 0,0579x - 0,1924				55	y = 0,0679x - 1,5624
		59	y = 0,0806x - 1,3333				59	y = 0,0202x + 0,3392
		62	y = 0,0375x + 0,8833				62	y = -0,0065x + 0,85
		66	y = 0,1357x - 2,1793				66	y = 0,0385x - 0,1008
		67	y = 0,0794x + 1,1029				67	y = 0,0497x - 1,6086
	15 kHz	animal number	wave 4			15 kHz	animal number	wave 4
		28	y = 0,0834x - 1,5				28	y = 0,0186x + 0,3222
		45	y = 0,0758x - 1,0383				45	y = 0,0683x - 2,0067
		55	y = 0,048x + 0,9571				55	y = 0,0559x - 1,2876
		59	y = 0,1113x - 1,933				59	y = 0,043x - 0,5011
		62	y = 0,112x - 2,46				62	y = 0,037x - 1,34
		66	y = 0,1362x - 1,2558				66	y = 0,0535x - 1,1846
		67	y = 0,1174x + 0,1631				67	y = 0,0158x - 0,3492
	20 kHz	animal number	wave 4			20 kHz	animal number	wave 4
		28	y = 0,0734x - 1,0459				28	y = 0,038x - 0,9423
		45	y = 0,095x - 2,4406				45	y = 0,0737x - 2,4167
		55	y = 0,0827x - 0,2746				55	y = 0,0246x - 0,2158
		59	y = 0,1249x - 2,3693				59	y = 0,067x - 1,1967
		62	y = 0,0875x - 0,91				62	y = 0,038x - 1,57
		66	y = 0,1259x - 0,7535				66	y = 0,0708x - 1,4247
		67	-				67	-
	25 kHz	animal number	wave 4			25 kHz	animal number	wave 4
		28	y = 0,0805x - 1,3667				28	y = 0,0243x - 0,42
		45	y = 0,0739x - 0,3661				45	y = 0,0958x - 3,7639
		55	y = 0,1248x - 1,9099				55	y = 0,0388x - 0,7735
		59	y = 0,0978x - 1,5129				59	y = 0,0625x - 1,0772
		62	y = 0,0971x - 1,1896				62	y = -0,009x + 0,8252
		66	y = 0,1604x - 2,5793				66	y = 0,048x - 0,8852
		67	y = 0,1143x - 1,6914				67	y = -0,0043x + 0,9314
	30 kHz	animal number	wave 4			30 kHz	animal number	wave 4
		28	y = 0,0626x - 0,5668				28	y = 0,0135x + 0,7246
		45	y = 0,067x - 0,5775				45	y = 0,0574x - 1,9825
		55	y = 0,1375x - 3,3684				55	y = 0,0602x - 2,0695
		59	y = 0,1598x - 4,4931				59	y = 0,0538x - 0,8036
		62	y = 0,0784x - 0,566				62	y = -0,0172x + 1,5574
		66	y = 0,1248x - 0,9653				66	y = 0,0672x - 1,6276
		67	-				67	-
	35 kHz	animal number	wave 4			35 kHz	animal number	wave 4
		28	y = 0,0626x - 1,1694				28	y = 0,0195x - 0,1517
		45	y = 0,0897x - 1,9922				45	y = 0,0409x - 1,1939
		55	y = -0,012x + 4,1				55	y = 0,037x - 1,47
		59	y = 0,0885x - 1,337				59	y = 0,0318x - 0,5316
		62	y = 0,0718x - 0,751				62	y = 0,0098x - 0,1458
		66	y = 0,163x - 3,3519				66	y = 0,0646x - 1,6298
		67	y = 0,0139x + 3,8307				67	y = 0,0414x - 1,4671
	40 kHz	animal number	wave 4			40 kHz	animal number	wave 4
		28	y = 0,0509x - 0,6525				28	y = 0,0429x - 1,3725
		45	y = 0,0811x - 2,2875				45	y = 0,0432x - 1,5625
		55	y = 0,1044x - 2,2811				55	y = 0,0015x + 0,4757
		59	y = 0,092x - 1,8032				59	y = 0,02x - 0,2584
		62	y = 0,0756x - 0,9602				62	y = 0,001x + 0,1994
		66	y = 0,1057x - 0,9716				66	y = 0,1117x - 4,3916
		67	y = 0,0667x + 1,0157				67	y = 0,0024x + 0,3414

## Sheet: noise only - increase
Mouse ABR analysis - all amplitude slopes - noise only
															pre-post
pre	5 kHz	animal number	wave 4		post	5 kHz	animal number	wave 4		pre-post	5 kHz	animal number	wave 4		total		animal number	wave 4
		28	0.0613				28	0.0642				28	-0.0029			5 kHz	28	-0.0029
		45	0.0905				45	0.016				45	0.0745				45	0.0745
		55	0.0861				55	0.0328				55	0.0533				55	0.0533
		59	0.1185				59	0.0212				59	0.0973				59	0.0973
		62	-				62	-				62	-				62	-
		66	0.1242				66	0.053				66	0.0712				66	0.0712
		67	0.0658				67	0.0065				67	0.0593				67	0.0593
		mean	0.0910667				mean	0.0322833				mean	0.0587833			10 kHz	28	0.0433
		SD	0.0260762				SD	0.0223647				SD	0.0338227				45	0.0582
		SE	0.0106456				SE	0.00913033				SE	0.015126				55	-0.01
																	59	0.0604
	10 kHz	animal number	wave 4			10 kHz	animal number	wave 4			10 kHz	animal number	wave 4				62	0.031
		28	0.0823				28	0.039				28	0.0433				66	0.0972
		45	0.1242				45	0.066				45	0.0582				67	0.0297
		55	0.0579				55	0.0679				55	-0.01			15 kHz	28	0.0648
		59	0.0806				59	0.0202				59	0.0604				45	0.0075
		62	0.0375				62	0.0065				62	0.031				55	-0.0079
		66	0.1357				66	0.0385				66	0.0972				59	0.0683
		67	0.0794				67	0.0497				67	0.0297				62	0.075
		mean	0.0853714				mean	0.0411143				mean	0.0442571				66	0.0827
		SD	0.0345322				SD	0.0225734				SD	0.033142				67	0.1016
		SE	0.0130519				SE	0.00853194				SE	0.0125265			20 kHz	28	0.0354
																	45	0.0213
	15 kHz	animal number	wave 4			15 kHz	animal number	wave 4			15 kHz	animal number	wave 4				55	0.0581
		28	0.0834				28	0.0186				28	0.0648				59	0.0579
		45	0.0758				45	0.0683				45	0.0075				62	0.0495
		55	0.048				55	0.0559				55	-0.0079				66	0.0551
		59	0.1113				59	0.043				59	0.0683				67	-
		62	0.112				62	0.037				62	0.075			25 kHz	28	0.0562
		66	0.1362				66	0.0535				66	0.0827				45	-0.0219
		67	0.1174				67	0.0158				67	0.1016				55	0.086
		mean	0.0977286				mean	0.0417286				mean	0.056				59	0.0353
		SD	0.0300388				SD	0.0194792				SD	0.0404505				62	0.1061
		SE	0.0113536				SE	0.00736244				SE	0.0152888				66	0.1124
																	67	0.11
	20 kHz	animal number	wave 4			20 kHz	animal number	wave 4			20 kHz	animal number	wave 4			30 kHz	28	0.0491
		28	0.0734				28	0.038				28	0.0354				45	0.0096
		45	0.095				45	0.0737				45	0.0213				55	0.0773
		55	0.0827				55	0.0246				55	0.0581				59	0.106
		59	0.1249				59	0.067				59	0.0579				62	0.0956
		62	0.0875				62	0.038				62	0.0495				66	0.0576
		66	0.1259				66	0.0708				66	0.0551				67	-
		67	-				67	-				67	-			35 kHz	28	0.0431
		mean	0.0982333				mean	0.0520167				mean	0.0462167				45	0.0488
		SD	0.0221819				SD	0.0209384				SD	0.0148677				55	-0.025
		SE	0.00905574				SE	0.00854808				SE	0.00664906				59	0.0567
																	62	0.062
	25 kHz	animal number	wave 4			25 kHz	animal number	wave 4			25 kHz	animal number	wave 4				66	0.0984
		28	0.0805				28	0.0243				28	0.0562				67	-0.0275
		45	0.0739				45	0.0958				45	-0.0219			40 kHz	28	0.008
		55	0.1248				55	0.0388				55	0.086				45	0.0379
		59	0.0978				59	0.0625				59	0.0353				55	0.1029
		62	0.0971				62	-0.009				62	0.1061				59	0.072
		66	0.1604				66	0.048				66	0.1124				62	0.0746
		67	0.1143				67	0.0043				67	0.11				66	-0.006
		mean	0.106971				mean	0.0378143				mean	0.0691571				67	0.0643
		SD	0.0294454				SD	0.035529				SD	0.0496524				mean	0.0532321
		SE	0.0111293				SE	0.0134287				SE	0.0187668				SD	0.0372294
																	SE	0.00511386
	30 kHz	animal number	wave 4			30 kHz	animal number	wave 4			30 kHz	animal number	wave 4
		28	0.0626				28	0.0135				28	0.0491
		45	0.067				45	0.0574				45	0.0096
		55	0.1375				55	0.0602				55	0.0773
		59	0.1598				59	0.0538				59	0.106
		62	0.0784				62	-0.0172				62	0.0956
		66	0.1248				66	0.0672				66	0.0576
		67	-				67	-				67	-
		mean	0.105017				mean	0.03915				mean	0.0658667
		SD	0.0409894				SD	0.0334988				SD	0.0350453
		SE	0.0167338				SE	0.0136758				SE	0.0156727
	35 kHz	animal number	wave 4			35 kHz	animal number	wave 4			35 kHz	animal number	wave 4
		28	0.0626				28	0.0195				28	0.0431
		45	0.0897				45	0.0409				45	0.0488
		55	0.012				55	0.037				55	-0.025
		59	0.0885				59	0.0318				59	0.0567
		62	0.0718				62	0.0098				62	0.062
		66	0.163				66	0.0646				66	0.0984
		67	0.0139				67	0.0414				67	-0.0275
		mean	0.0716429				mean	0.035				mean	0.0366429
		SD	0.0515261				SD	0.0175188				SD	0.0464809
		SE	0.019475				SE	0.0066215				SE	0.0175681
	40 kHz	animal number	wave 4			40 kHz	animal number	wave 4			40 kHz	animal number	wave 4
		28	0.0509				28	0.0429				28	0.008
		45	0.0811				45	0.0432				45	0.0379
		55	0.1044				55	0.0015				55	0.1029
		59	0.092				59	0.02				59	0.072
		62	0.0756				62	0.001				62	0.0746
		66	0.1057				66	0.1117				66	-0.006
		67	0.0667				67	0.0024				67	0.0643
		mean	0.0823429				mean	0.0318143				mean	0.0505286
		SD	0.0200237				SD	0.0398068				SD	0.0390225
		SE	0.00756826				SE	0.0150456				SE	0.0147491
		noise only - pre					noise only - post					noise only - pre-post
		wave 4					wave 4					wave 4
		mean	SE				mean	SE				mean	SE
	5	0.0910667	0.0106456			5	0.0322833	0.00913033			5	0.0587833	0.015126
	10	0.0853714	0.0130519			10	0.0411143	0.00853194			10	0.0442571	0.0125265
	15	0.0977286	0.0113536			15	0.0417286	0.00736244			15	0.056	0.0152888
	20	0.0982333	0.00905574			20	0.0520167	0.00854808			20	0.0462167	0.00664906
	25	0.106971	0.0111293			25	0.0378143	0.0134287			25	0.0691571	0.0187668
	30	0.105017	0.0167338			30	0.03915	0.0136758			30	0.0658667	0.0156727
	35	0.0716429	0.019475			35	0.035	0.0066215			35	0.0366429	0.0175681
	40	0.0823429	0.00756826			40	0.0318143	0.0150456			40	0.0505286	0.0147491

## Sheet: 5 minutes - functions
Mouse ABR analysis - all amplitude slopes - 5 minutes
pre	5 kHz	animal number	wave 4		post	5 kHz	animal number	wave 4
		49	y = 0,1057x - 1,5914				49	y = 0,1529x - 3,1168
		52	y = 0,0871x - 1,7217				52	y = 0,0016x + 1,3244
		54	y = 0,1355x - 2,3707				54	y = 0,131x - 3,3632
		57	y = 0,0428x - 0,5265				57	y = 0,0063x + 0,5721
		60	y = 0,1479x - 3,7193				60	y = 0,1226x - 4,7029
		61	y = 0,162x - 3,7867				61	y = 0,013x + 0,0883
		64	y = 0,0707x - 0,8573				64	y = 0,0257x - 0,1487
	10 kHz	animal number	wave 4			10 kHz	animal number	wave 4
		49	y = 0,0981x - 0,8547				49	y = 0,1398x - 1,8138
		52	y = 0,1233x - 2,0122				52	y = 0,0198x + 0,5285
		54	y = 0,079x - 0,8361				54	y = 0,158x - 2,6467
		57	y = 0,0541x - 0,6727				57	y = 0,0153x + 0,4737
		60	y = 0,1315x - 2,2227				60	y = 0,0337x - 0,7871
		61	y = 0,134x - 2,615				61	y = 0,0032x + 0,2176
		64	y = 0,0795x - 1,3842				64	y = 0,0172x - 0,0987
	15 kHz	animal number	wave 4			15 kHz	animal number	wave 4
		49	y = 0,1095x - 0,4029				49	y = 0,1515x - 1,5513
		52	y = 0,1243x - 2,1515				52	y = 0,0305x - 0,1176
		54	y = 0,0375x + 0,8239				54	y = 0,1533x - 2,2493
		57	y = 0,062x - 0,4249				57	y = 0,0114x + 0,5592
		60	y = 0,1236x - 2,3779				60	y = 0,0533x - 1,8764
		61	-				61	-
		64	y = 0,0765x - 1,7314				64	y = 0,0225x - 0,1553
	20 kHz	animal number	wave 4			20 kHz	animal number	wave 4
		49	y = 0,1222x - 1,1454				49	y = 0,1012x - 0,993
		52	y = 0,1046x - 1,5914				52	y = 0,0372x - 0,3218
		54	y = 0,1255x - 1,6739				54	y = 0,133x - 2,4104
		57	y = 0,0786x - 1,5114				57	y = 0,0195x + 0,337
		60	y = 0,1139x - 1,0963				60	y = 0,0559x - 1,4167
		61	y = 0,0931x - 0,0502				61	y = 0,0015x + 0,3069
		64	y = 0,0848x - 1,6344				64	y = 0,0333x - 0,4804
	25 kHz	animal number	wave 4			25 kHz	animal number	wave 4
		49	y = 0,0257x - 0,3393				49	y = 0,189x - 4,798
		52	y = 0,1043x - 2,2286				52	y = 0,0437x - 0,9033
		54	y = 0,0419x - 0,1157				54	y = 0,1078x - 2,111
		57	y = 0,0677x - 0,7866				57	y = -0,0046x + 1,0058
		60	y = 0,1231x - 1,9062				60	y = 0,0516x - 1,1714
		61	y = 0,1234x - 1,399				61	y = -0,016x + 1,198
		64	y = 0,1189x - 3,1257				64	y = 0,0037x + 1,1386
	30 kHz	animal number	wave 4			30 kHz	animal number	wave 4
		49	y = 0,1018x - 1,2412				49	y = -0,0073x + 1,9304
		52	y = 0,0758x - 0,7632				52	y = -0,0028x + 1,8128
		54	y = 0,1532x - 2,9308				54	y = 0,1359x - 2,8159
		57	y = 0,0539x - 0,7467				57	y = -0,0207x + 1,9001
		60	y = 0,0563x + 1,9783				60	y = 0,017x + 0,4251
		61	y = 0,0489x + 2,6257				61	y = -0,0052x + 0,536
		64	y = 0,1054x - 2,2347				64	y = 0,023x - 0,043
	35 kHz	animal number	wave 4			35 kHz	animal number	wave 4
		49	y = 0,0281x - 0,3881				49	y = 0,078x - 0,8416
		52	y = 0,0685x - 0,9037				52	y = 0,0139x + 0,3308
		54	y = 0,1319x - 3,4741				54	y = 0,096x - 2,1365
		57	y = 0,0634x - 0,6957				57	y = -0,0049x + 0,9281
		60	y = 0,107x - 0,525				60	y = 0,0736x - 2,8779
		61	y = 0,1563x - 4,1753				61	y = 0,0143x - 0,2661
		64	y = 0,0852x - 2,087				64	y = 0,0143x + 0,103
	40 kHz	animal number	wave 4			40 kHz	animal number	wave 4
		49	y = 0,0744x - 0,8413				49	y = 0,0733x - 0,9145
		52	y = 0,1906x - 6,2114				52	y = 0,0343x - 0,4789
		54	y = 0,1226x - 2,2651				54	y = 0,0693x - 1,1082
		57	y = 0,0695x - 1,3078				57	y = -0,0142x + 1,2052
		60	y = 0,0619x + 0,8507				60	y = 0,05x - 1,37
		61	y = 0,1239x - 2,5215				61	y = -0,0002x + 0,715
		64	y = 0,0693x - 1,295				64	y = 0,0334x - 0,3874

## Sheet: 5 minutes - increase
Mouse ABR analysis - all amplitude slopes - 5 minutes
															pre-post
pre	5 kHz	animal number	wave 4		post	5 kHz	animal number	wave 4		pre-post	5 kHz	animal number	wave 4		total		animal number	wave 4
		49	0.1057				49	0.1529				49	-0.0472			5 kHz	49	-0.0472
		52	0.0871				52	0.0016				52	0.0855				52	0.0855
		54	0.1355				54	0.131				54	0.0045				54	0.0045
		57	0.0428				57	0.0063				57	0.0365				57	0.0365
		60	0.1479				60	0.1226				60	0.0253				60	0.0253
		61	0.162				61	0.013				61	0.149				61	0.149
		64	0.0707				64	0.0257				64	0.045				64	0.045
		mean	0.107386				mean	0.0647286				mean	0.0426571			10 kHz	49	-0.0417
		SD	0.0434857				SD	0.0672228				SD	0.0619398				52	0.1035
		SE	0.0164361				SE	0.0254078				SE	0.0234111				54	-0.079
																	57	0.0388
	10 kHz	animal number	wave 4			10 kHz	animal number	wave 4			10 kHz	animal number	wave 4				60	0.0978
		49	0.0981				49	0.1398				49	-0.0417				61	0.1308
		52	0.1233				52	0.0198				52	0.1035				64	0.0623
		54	0.079				54	0.158				54	-0.079			15 kHz	49	-0.042
		57	0.0541				57	0.0153				57	0.0388				52	0.0938
		60	0.1315				60	0.0337				60	0.0978				54	-0.1158
		61	0.134				61	0.0032				61	0.1308				57	0.0506
		64	0.0795				64	0.0172				64	0.0623				60	0.0703
		mean	0.0999286				mean	0.0552857				mean	0.0446429				61	-
		SD	0.0307213				SD	0.0647822				SD	0.0783172				64	0.054
		SE	0.0116115				SE	0.0244854				SE	0.0296011			20 kHz	49	0.021
																	52	0.0674
	15 kHz	animal number	wave 4			15 kHz	animal number	wave 4			15 kHz	animal number	wave 4				54	-0.0075
		49	0.1095				49	0.1515				49	-0.042				57	0.0591
		52	0.1243				52	0.0305				52	0.0938				60	0.058
		54	0.0375				54	0.1533				54	-0.1158				61	0.0916
		57	0.062				57	0.0114				57	0.0506				64	0.0515
		60	0.1236				60	0.0533				60	0.0703			25 kHz	49	-0.1633
		61	-				61	-				61	-				52	0.0606
		64	0.0765				64	0.0225				64	0.054				54	-0.0659
		mean	0.0889				mean	0.0704167				mean	0.0184833				57	0.0723
		SD	0.0357797				SD	0.0649761				SD	0.0804248				60	0.0715
		SE	0.014607				SE	0.0265264				SE	0.0359671				61	0.1394
																	64	0.1152
	20 kHz	animal number	wave 4			20 kHz	animal number	wave 4			20 kHz	animal number	wave 4			30 kHz	49	0.1091
		49	0.1222				49	0.1012				49	0.021				52	0.0786
		52	0.1046				52	0.0372				52	0.0674				54	0.0173
		54	0.1255				54	0.133				54	-0.0075				57	0.0746
		57	0.0786				57	0.0195				57	0.0591				60	0.0393
		60	0.1139				60	0.0559				60	0.058				61	0.0541
		61	0.0931				61	0.0015				61	0.0916				64	0.0824
		64	0.0848				64	0.0333				64	0.0515			35 kHz	49	-0.0499
		mean	0.103243				mean	0.0545143				mean	0.0487286				52	0.0546
		SD	0.0183506				SD	0.0467758				SD	0.0324508				54	0.0359
		SE	0.00693586				SE	0.0176796				SE	0.0122652				57	0.0683
																	60	0.0334
	25 kHz	animal number	wave 4			25 kHz	animal number	wave 4			25 kHz	animal number	wave 4				61	0.142
		49	0.0257				49	0.189				49	-0.1633				64	0.0709
		52	0.1043				52	0.0437				52	0.0606			40 kHz	49	0.0011
		54	0.0419				54	0.1078				54	-0.0659				52	0.1563
		57	0.0677				57	-0.0046				57	0.0723				54	0.0533
		60	0.1231				60	0.0516				60	0.0715				57	0.0837
		61	0.1234				61	-0.016				61	0.1394				60	0.0119
		64	0.1189				64	0.0037				64	0.1152				61	0.1241
		mean	0.0864286				mean	0.0536				mean	0.0328286				64	0.0359
		SD	0.0410426				SD	0.0731371				SD	0.108152				mean	0.0467236
		SE	0.0155126				SE	0.0276432				SE	0.0408776				SD	0.0646271
																	SE	0.00871432
	30 kHz	animal number	wave 4			30 kHz	animal number	wave 4			30 kHz	animal number	wave 4
		49	0.1018				49	-0.0073				49	0.1091
		52	0.0758				52	-0.0028				52	0.0786
		54	0.1532				54	0.1359				54	0.0173
		57	0.0539				57	-0.0207				57	0.0746
		60	0.0563				60	0.017				60	0.0393
		61	0.0489				61	-0.0052				61	0.0541
		64	0.1054				64	0.023				64	0.0824
		mean	0.0850429				mean	0.0199857				mean	0.0650571
		SD	0.0377014				SD	0.0532408				SD	0.0304939
		SE	0.0142498				SE	0.0201231				SE	0.0115256
	35 kHz	animal number	wave 4			35 kHz	animal number	wave 4			35 kHz	animal number	wave 4
		49	0.0281				49	0.078				49	-0.0499
		52	0.0685				52	0.0139				52	0.0546
		54	0.1319				54	0.096				54	0.0359
		57	0.0634				57	-0.0049				57	0.0683
		60	0.107				60	0.0736				60	0.0334
		61	0.1563				61	0.0143				61	0.142
		64	0.0852				64	0.0143				64	0.0709
		mean	0.0914857				mean	0.0407429				mean	0.0507429
		SD	0.0436832				SD	0.040256				SD	0.0573111
		SE	0.0165107				SE	0.0152154				SE	0.0216616
	40 kHz	animal number	wave 4			40 kHz	animal number	wave 4			40 kHz	animal number	wave 4
		49	0.0744				49	0.0733				49	0.0011
		52	0.1906				52	0.0343				52	0.1563
		54	0.1226				54	0.0693				54	0.0533
		57	0.0695				57	-0.0142				57	0.0837
		60	0.0619				60	0.05				60	0.0119
		61	0.1239				61	-0.0002				61	0.1241
		64	0.0693				64	0.0334				64	0.0359
		mean	0.101743				mean	0.0351286				mean	0.0666143
		SD	0.0469907				SD	0.0329924				SD	0.0578021
		SE	0.0177608				SE	0.01247				SE	0.0218471
		5min - pre					5min - post					5min - pre-post
		wave 4					wave 4					wave 4
		mean	SE				mean	SE				mean	SE
	5	0.107386	0.0164361			5	0.0647286	0.0254078			5	0.0426571	0.0234111
	10	0.0999286	0.0116115			10	0.0552857	0.0244854			10	0.0446429	0.0296011
	15	0.0889	0.014607			15	0.0704167	0.0265264			15	0.0184833	0.0359671
	20	0.103243	0.00693586			20	0.0545143	0.0176796			20	0.0487286	0.0122652
	25	0.0864286	0.0155126			25	0.0536	0.0276432			25	0.0328286	0.0408776
	30	0.0850429	0.0142498			30	0.0199857	0.0201231			30	0.0650571	0.0115256
	35	0.0914857	0.0165107			35	0.0407429	0.0152154			35	0.0507429	0.0216616
	40	0.101743	0.0177608			40	0.0351286	0.01247			40	0.0666143	0.0218471

## Sheet: 10 minutes - functions
Mouse ABR analysis - all amplitude slopes - 10 minutes
pre	5 kHz	animal number	wave 4		post	5 kHz	animal number	wave 4
		5	y = 0,0397x - 0,1379				5	y = 0,0414x - 1,1903
		7	y = 0,0105x + 1,16				7	y = -0,0016x + 1,37
		8	y = 0,0587x - 0,3063				8	y = 0,0253x + 0,3797
		18	y = 0,0501x - 0,924				18	y = 0,0957x - 2,736
		34	y = 0,0741x + 0,1255				34	y = 0,0194x - 0,3706
		38	y = 0,0027x + 1,6379				38	y = 0,0528x - 1,6318
		42	y = 0,0438x - 0,6905				42	y = 0,0564x - 0,3749
	10 kHz	animal number	wave 4			10 kHz	animal number	wave 4
		5	y = 0,0433x - 1,0314				5	y = 0,1125x - 4,0627
		7	y = 0,0292x - 0,1778				7	y = 0,073x - 1,73
		8	y = 0,073x - 1,0189				8	y = 0,0412x - 0,2617
		18	y = 0,1436x - 3,0345				18	y = 0,0968x - 2,6386
		34	y = 0,0194x - 0,3706				34	y = 0,0569x - 1,6386
		38	y = 0,0631x - 1,1222				38	y = 0,0454x - 1,0867
		42	y = 0,0808x - 1,8561				42	y = 0,0642x - 1,2467
	15 kHz	animal number	wave 4			15 kHz	animal number	wave 4
		5	y = 0,0904x - 2,4113				5	y = 0,0818x - 2,4
		7	y = 0,0502x - 0,5728				7	y = 0,0658x - 0,9506
		8	y = 0,0542x + 0,2203				8	y = 0,0655x - 1,0116
		18	y = 0,0454x + 1,2695				18	y = 0,0617x - 1,474
		34	y = 0,1213x - 0,713				34	y = 0,1458x - 5,1735
		38	y = 0,0504x - 0,1921				38	y = 0,0329x - 0,632
		42	y = 0,0475x - 0,5008				42	y = 0,0508x - 0,1555
	20 kHz	animal number	wave 4			20 kHz	animal number	wave 4
		5	y = 0,0331x - 0,2996				5	y = 0,0977x - 3,3339
		7	y = 0,053x - 0,8122				7	y = 0,0767x - 1,7594
		8	y = 0,0763x - 1,0558				8	y = 0,0652x - 0,8924
		18	y = 0,0596x + 0,2317				18	y = 0,0482x - 0,7083
		34	y = 0,0946x - 0,0357				34	y = 0,0814x - 2,57
		38	y = 0,0337x + 0,5686				38	y = 0,0541x - 1,5236
		42	y = 0,0827x - 2,0367				42	y = 0,0379x + 0,0608
	25 kHz	animal number	wave 4			25 kHz	animal number	wave 4
		5	y = 0,0894x - 2,3829				5	y = 0,0684x - 2,3564
		7	y = 0,0356x + 0,1289				7	y = 0,0657x - 1,2334
		8	y = 0,0637x - 0,0815				8	y = 0,0778x - 1,4237
		18	y = 0,1016x - 1,5079				18	y = 0,1179x - 3,8736
		34	y = 0,0446x + 2,802				34	y = 0,0746x - 2,802
		38	y = 0,0704x - 0,9984				38	y = 0,0251x - 0,351
		42	y = 0,0659x - 1,3571				42	y = 0,0597x - 0,8603
	30 kHz	animal number	wave 4			30 kHz	animal number	wave 4
		5	y = 0,0305x - 0,4928				5	y = 0,0499x - 1,4772
		7	y = 0,0165x + 0,9475				7	y = 0,0192x + 0,4825
		8	y = 0,0955x - 1,6371				8	y = 0,0595x - 0,6334
		18	y = 0,1309x - 2,8579				18	y = 0,0971x - 2,1984
		34	y = 0,1286x - 1,4571				34	y = 0,0394x - 0,7139
		38	y = 0,0098x + 2,129				38	y = 0,0192x + 0,526
		42	y = 0,0499x - 0,7429				42	y = 0,0774x - 1,6057
	35 kHz	animal number	wave 4			35 kHz	animal number	wave 4
		5	y = 0,0067x + 1,1007				5	y = 0,0187x + 0,0981
		7	y = 0,0335x - 0,1125				7	y = 0,0637x - 1,6225
		8	y = 0,1041x - 2,1571				8	y = 0,0335x + 0,225
		18	y = 0,1164x - 2,5636				18	y = 0,0974x - 3,5086
		34	y = 0,1286x - 1,9975				34	y = 0,0376x - 0,7921
		38	y = 0,0428x + 0,0093				38	y = 0,0424x - 1,2393
		42	y = 0,0299x - 0,0333				42	y = 0,0659x - 1,0181
	40 kHz	animal number	wave 4			40 kHz	animal number	wave 4
		5	y = 0,041x - 0,7214				5	y = 0,0459x - 1,6929
		7	y = 0,0411x - 0,7308				7	y = -0,0078x + 1,4302
		8	y = 0,0651x - 1,0489				8	y = 0,0501x - 0,924
		18	y = 0,1321x - 4,1179				18	y = 0,1475x - 5,4607
		34	y = 0,1213x - 2,3279				34	y = -0,0037x + 1,1505
		38	y = 0,0122x + 1,257				38	y = 0,0048x + 0,438
		42	y = 0,0428x - 0,9				42	y = 0,0674x - 1,44

## Sheet: 10 minutes - increase
Mouse ABR analysis - all amplitude slopes - 10 minutes
															pre-post
pre	5 kHz	animal number	wave 4		post	5 kHz	animal number	wave 4		pre-post	5 kHz	animal number	wave 4		total		animal number	wave 4
		5	0.0397				5	0.0414				5	-0.0017			5 kHz	5	-0.0017
		7	0.0105				7	-0.0016				7	0.0121				7	0.0121
		8	0.0587				8	0.0253				8	0.0334				8	0.0334
		18	0.0501				18	0.0957				18	-0.0456				18	-0.0456
		34	0.0741				34	0.0194				34	0.0547				34	0.0547
		38	0.0027				38	0.0528				38	-0.0501				38	-0.0501
		42	0.0438				42	0.0564				42	-0.0126				42	-0.0126
		mean	0.0399429				mean	0.0413429				mean	-0.0014			10 kHz	5	-0.0692
		SD	0.0254642				SD	0.0313465				SD	0.0387112				7	-0.0438
		SE	0.00962457				SE	0.0118479				SE	0.0146315				8	0.0318
																	18	0.0468
	10 kHz	animal number	wave 4			10 kHz	animal number	wave 4			10 kHz	animal number	wave 4				34	-0.0375
		5	0.0433				5	0.1125				5	-0.0692				38	0.0177
		7	0.0292				7	0.073				7	-0.0438				42	0.0166
		8	0.073				8	0.0412				8	0.0318			15 kHz	5	0.0086
		18	0.1436				18	0.0968				18	0.0468				7	-0.0156
		34	0.0194				34	0.0569				34	-0.0375				8	-0.0113
		38	0.0631				38	0.0454				38	0.0177				18	-0.0163
		42	0.0808				42	0.0642				42	0.0166				34	-0.0245
		mean	0.0646286				mean	0.07				mean	-0.00537143				38	0.0175
		SD	0.0414852				SD	0.0263734				SD	0.044162				42	-0.0033
		SE	0.0156799				SE	0.00996821				SE	0.0166917			20 kHz	5	-0.0646
																	7	-0.0237
	15 kHz	animal number	wave 4			15 kHz	animal number	wave 4			15 kHz	animal number	wave 4				8	0.0111
		5	0.0904				5	0.0818				5	0.0086				18	0.0114
		7	0.0502				7	0.0658				7	-0.0156				34	0.0132
		8	0.0542				8	0.0655				8	-0.0113				38	-0.0204
		18	0.0454				18	0.0617				18	-0.0163				42	0.0448
		34	0.1213				34	0.1458				34	-0.0245			25 kHz	5	0.021
		38	0.0504				38	0.0329				38	0.0175				7	-0.0301
		42	0.0475				42	0.0508				42	-0.0033				8	-0.0141
		mean	0.0656286				mean	0.0720429				mean	-0.00641429				18	-0.0163
		SD	0.0290153				SD	0.0358411				SD	0.0149448				34	-0.03
		SE	0.0109668				SE	0.0135467				SE	0.00564862				38	0.0453
																	42	0.0062
	20 kHz	animal number	wave 4			20 kHz	animal number	wave 4			20 kHz	animal number	wave 4			30 kHz	5	-0.0194
		5	0.0331				5	0.0977				5	-0.0646				7	-0.0027
		7	0.053				7	0.0767				7	-0.0237				8	0.036
		8	0.0763				8	0.0652				8	0.0111				18	0.0338
		18	0.0596				18	0.0482				18	0.0114				34	0.0892
		34	0.0946				34	0.0814				34	0.0132				38	-0.0094
		38	0.0337				38	0.0541				38	-0.0204				42	-0.0275
		42	0.0827				42	0.0379				42	0.0448			35 kHz	5	-0.012
		mean	0.0618571				mean	0.0658857				mean	-0.00402857				7	-0.0302
		SD	0.0238693				SD	0.0208373				SD	0.0352889				8	0.0706
		SE	0.00902174				SE	0.00787574				SE	0.013338				18	0.019
																	34	0.091
	25 kHz	animal number	wave 4			25 kHz	animal number	wave 4			25 kHz	animal number	wave 4				38	0.0004
		5	0.0894				5	0.0684				5	0.021				42	-0.036
		7	0.0356				7	0.0657				7	-0.0301			40 kHz	5	-0.0049
		8	0.0637				8	0.0778				8	-0.0141				7	0.0489
		18	0.1016				18	0.1179				18	-0.0163				8	0.015
		34	0.0446				34	0.0746				34	-0.03				18	-0.0154
		38	0.0704				38	0.0251				38	0.0453				34	0.125
		42	0.0659				42	0.0597				42	0.0062				38	0.0074
		mean	0.0673143				mean	0.0698857				mean	-0.00257143				42	-0.0246
		SD	0.0231287				SD	0.0274453				SD	0.0281536				mean	0.00385179
		SE	0.00874181				SE	0.0103734				SE	0.0106411				SD	0.0383424
																	SE	0.00512372
	30 kHz	animal number	wave 4			30 kHz	animal number	wave 4			30 kHz	animal number	wave 4
		5	0.0305				5	0.0499				5	-0.0194
		7	0.0165				7	0.0192				7	-0.0027
		8	0.0955				8	0.0595				8	0.036
		18	0.1309				18	0.0971				18	0.0338
		34	0.1286				34	0.0394				34	0.0892
		38	0.0098				38	0.0192				38	-0.0094
		42	0.0499				42	0.0774				42	-0.0275
		mean	0.0659571				mean	0.0516714				mean	0.0142857
		SD	0.0518478				SD	0.0290101				SD	0.0412205
		SE	0.0195966				SE	0.0109648				SE	0.0155799
	35 kHz	animal number	wave 4			35 kHz	animal number	wave 4			35 kHz	animal number	wave 4
		5	0.0067				5	0.0187				5	-0.012
		7	0.0335				7	0.0637				7	-0.0302
		8	0.1041				8	0.0335				8	0.0706
		18	0.1164				18	0.0974				18	0.019
		34	0.1286				34	0.0376				34	0.091
		38	0.0428				38	0.0424				38	0.0004
		42	0.0299				42	0.0659				42	-0.036
		mean	0.066				mean	0.0513143				mean	0.0146857
		SD	0.0488616				SD	0.0262635				SD	0.0491068
		SE	0.0184679				SE	0.00992667				SE	0.0185606
	40 kHz	animal number	wave 4			40 kHz	animal number	wave 4			40 kHz	animal number	wave 4
		5	0.041				5	0.0459				5	-0.0049
		7	0.0411				7	-0.0078				7	0.0489
		8	0.0651				8	0.0501				8	0.015
		18	0.1321				18	0.1475				18	-0.0154
		34	0.1213				34	-0.0037				34	0.125
		38	0.0122				38	0.0048				38	0.0074
		42	0.0428				42	0.0674				42	-0.0246
		mean	0.0650857				mean	0.0434571				mean	0.0216286
		SD	0.0449072				SD	0.0544575				SD	0.0514583
		SE	0.0169733				SE	0.020583				SE	0.0194494
		10min - pre					10min - post					10min - pre-post
		wave 4					wave 4					wave 4
		mean	SE				mean	SE				mean	SE
	5	0.0399429	0.00962457			5	0.0413429	0.0118479			5	-0.0014	0.0146315
	10	0.0646286	0.0156799			10	0.07	0.00996821			10	-0.00537143	0.0166917
	15	0.0656286	0.0109668			15	0.0720429	0.0135467			15	-0.00641429	0.00564862
	20	0.0618571	0.00902174			20	0.0658857	0.00787574			20	-0.00402857	0.013338
	25	0.0673143	0.00874181			25	0.0698857	0.0103734			25	-0.00257143	0.0106411
	30	0.0659571	0.0195966			30	0.0516714	0.0109648			30	0.0142857	0.0155799
	35	0.066	0.0184679			35	0.0513143	0.00992667			35	0.0146857	0.0185606
	40	0.0650857	0.0169733			40	0.0434571	0.020583			40	0.0216286	0.0194494

## Sheet: 20 minutes - functions
Mouse ABR analysis - all amplitude slopes - 20 minutes
pre	5 kHz	animal number	wave 4		post	5 kHz	animal number	wave 4
		9	y = 0,0796x - 1,888				9	y = 0,0722x - 2,6632
		10	y = 0,0524x + 0,315				10	y = 0,0467x - 0,8694
		17	y = 0,0474x + 0,1756				17	y = 0,078x - 2,1194
		21	y = 0,0932x - 1,0939				21	y = 0,0808x - 2,256
		25	y = 0,05x + 1,67				25	y = -0,013x + 1,2983
		30	y = 0,0932x - 1,7195				30	y = 0,053x - 0,9118
		40	y = 0,0407x + 0,3862				40	y = 0,0131x + 0,0155
	10 kHz	animal number	wave 4			10 kHz	animal number	wave 4
		9	y = 0,0738x - 2,3468				9	y = 0,0851x - 3,4287
		10	y = 0,1122x - 2,6478				10	y = 0,0896x - 2,56
		17	y = 0,0455x + 0,0675				17	y = 0,0482x - 1,155
		21	y = 0,1081x - 1,095				21	y = 0,1216x - 4,4314
		25	y = 0,0326x + 3,538				25	y = -0,003x + 0,58
		30	y = 0,1038x - 2,0832				30	y = 0,1017x - 2,4461
		40	y = 0,0938x - 1,7105				40	y = 0,0058x + 0,4554
	15 kHz	animal number	wave 4			15 kHz	animal number	wave 4
		9	y = 0,07x - 0,9329				9	y = 0,0509x - 1,6851
		10	y = 0,0474x + 1,1756				10	y = 0,0391x - 0,2022
		17	y = 0,0636x - 0,1396				17	y = 0,0316x - 0,622
		21	y = 0,0294x + 2,0543				21	y = 0,0931x - 2,4311
		25	y = 0,128x - 1,7199				25	y = 0,033x - 0,6142
		30	y = 0,1104x - 1,512				30	y = 0,0586x - 0,8763
		40	y = 0,098x - 1,1541				40	y = 0,0668x - 1,2782
	20 kHz	animal number	wave 4			20 kHz	animal number	wave 4
		9	y = 0,0917x - 2,5185				9	y = 0,064x - 2,5375
		10	y = 0,0795x - 0,9956				10	y = 0,0346x - 0,1706
		17	y = 0,0972x - 1,942				17	y = 0,0976x - 3,242
		21	y = 0,1084x - 1,5707				21	y = 0,0671x - 1,9954
		25	y = 0,058x + 1,5514				25	y = 0,0796x - 2,5129
		30	y = 0,1134x - 2,2797				30	y = 0,0643x - 1,4739
		40	y = 0,0755x - 0,43				40	y = 0,0308x - 0,8694
	25 kHz	animal number	wave 4			25 kHz	animal number	wave 4
		9	y = 0,1009x - 2,9051				9	y = 0,0682x - 2,5092
		10	y = 0,0902x - 1,2433				10	y = 0,0404x - 0,1822
		17	y = 0,1226x - 2,8045				17	y = 0,0898x - 2,4186
		21	y = 0,0911x - 0,8657				21	y = 0,0324x - 0,7236
		25	y = 0,1216x - 1,6635				25	y = 0,1438x - 3,9517
		30	y = 0,125x - 2,1571				30	y = 0,1242x - 4,1707
		40	y = 0,0679x - 0,435				40	y = 0,0201x - 0,1783
	30 kHz	animal number	wave 4			30 kHz	animal number	wave 4
		9	y = 0,0941x - 2,4314				9	y = 0,0585x - 1,8501
		10	y = 0,0514x + 0,3261				10	y = 0,0597x - 1,3417
		17	y = 0,0899x - 1,4229				17	y = 0,083x - 2,3948
		21	y = 0,0804x - 0,5375				21	y = 0,0501x - 1,3436
		25	y = 0,0544x + 1,8176				25	y = 0,0351x - 1,1673
		30	y = 0,11x - 2,1629				30	y = 0,0987x - 2,4397
		40	y = 0,0688x - 0,3827				40	y = 0,0178x - 0,3251
	35 kHz	animal number	wave 4			35 kHz	animal number	wave 4
		9	y = 0,1003x - 3,2288				9	y = 0,0683x - 2,6442
		10	y = 0,091x - 1,2017				10	y = 0,0443x - 0,7833
		17	y = 0,0963x - 2,2258				17	y = 0,066x - 1,8799
		21	y = 0,0803x - 1,2462				21	y = 0,0237x - 0,461
		25	y = 0,0988x - 1,657				25	y = 0,0476x - 0,5535
		30	y = 0,1177x - 2,0466				30	y = 0,0593x - 1,2541
		40	y = 0,0459x + 0,5089				40	y = 0,0208x - 0,2249
	40 kHz	animal number	wave 4			40 kHz	animal number	wave 4
		9	y = 0,0928x - 3,2417				9	y = 0,0805x - 3,1874
		10	y = 0,0594x - 0,115				10	y = 0,0657x - 2,1325
		17	y = 0,0269x + 0,0053				17	y = 0,1085x - 4,3173
		21	y = 0,0893x - 1,9235				21	y = 0,0177x - 0,1317
		25	y = 0,077x - 0,58				25	y = 0,0345x - 0,9308
		30	y = 0,0907x - 1,9284				30	y = 0,046x - 0,9885
		40	y = 0,0648x - 0,8435				40	y = 0,0133x - 0,0801

## Sheet: 20 minutes - increase
Mouse ABR analysis - all amplitude slopes - 20 minutes
															pre-post
pre	5 kHz	animal number	wave 4		post	5 kHz	animal number	wave 4		pre-post	5 kHz	animal number	wave 4		total		animal number	wave 4
		9	0.0796				9	0.0722				9	0.0074			5 kHz	9	0.0074
		10	0.0524				10	0.0467				10	0.0057				10	0.0057
		17	0.0474				17	0.078				17	-0.0306				17	-0.0306
		21	0.0932				21	0.0808				21	0.0124				21	0.0124
		25	0.05				25	0.013				25	0.037				25	0.037
		30	0.0932				30	0.053				30	0.0402				30	0.0402
		40	0.0407				40	0.0131				40	0.0276				40	0.0276
		mean	0.0652143				mean	0.0509714				mean	0.0142429			10 kHz	9	-0.0113
		SD	0.0226838				SD	0.028779				SD	0.0241666				10	0.0226
		SE	0.00857367				SE	0.0108774				SE	0.00913413				17	-0.0027
																	21	-0.0135
	10 kHz	animal number	wave 4			10 kHz	animal number	wave 4			10 kHz	animal number	wave 4				25	0.0296
		9	0.0738				9	0.0851				9	-0.0113				30	0.0021
		10	0.1122				10	0.0896				10	0.0226				40	0.088
		17	0.0455				17	0.0482				17	-0.0027			15 kHz	9	0.0191
		21	0.1081				21	0.1216				21	-0.0135				10	0.0083
		25	0.0326				25	0.003				25	0.0296				17	0.032
		30	0.1038				30	0.1017				30	0.0021				21	-0.0637
		40	0.0938				40	0.0058				40	0.088				25	0.095
		mean	0.0814				mean	0.065				mean	0.0164				30	0.0518
		SD	0.0317413				SD	0.0468873				SD	0.0355196				40	0.0312
		SE	0.0119971				SE	0.0177217				SE	0.0134251			20 kHz	9	0.0277
																	10	0.0449
	15 kHz	animal number	wave 4			15 kHz	animal number	wave 4			15 kHz	animal number	wave 4				17	-0.0004
		9	0.07				9	0.0509				9	0.0191				21	0.0413
		10	0.0474				10	0.0391				10	0.0083				25	-0.0216
		17	0.0636				17	0.0316				17	0.032				30	0.0491
		21	0.0294				21	0.0931				21	-0.0637				40	0.0447
		25	0.128				25	0.033				25	0.095			25 kHz	9	0.0327
		30	0.1104				30	0.0586				30	0.0518				10	0.0498
		40	0.098				40	0.0668				40	0.0312				17	0.0328
		mean	0.0781143				mean	0.0533				mean	0.0248143				21	0.0587
		SD	0.0354009				SD	0.021927				SD	0.048109				25	-0.0222
		SE	0.0133803				SE	0.00828763				SE	0.0181835				30	0.0008
																	40	0.0478
	20 kHz	animal number	wave 4			20 kHz	animal number	wave 4			20 kHz	animal number	wave 4			30 kHz	9	0.0356
		9	0.0917				9	0.064				9	0.0277				10	-0.0083
		10	0.0795				10	0.0346				10	0.0449				17	0.0069
		17	0.0972				17	0.0976				17	-0.0004				21	0.0303
		21	0.1084				21	0.0671				21	0.0413				25	0.0193
		25	0.058				25	0.0796				25	-0.0216				30	0.0113
		30	0.1134				30	0.0643				30	0.0491				40	0.051
		40	0.0755				40	0.0308				40	0.0447			35 kHz	9	0.032
		mean	0.0891				mean	0.0625714				mean	0.0265286				10	0.0467
		SD	0.0194922				SD	0.0235738				SD	0.0271976				17	0.0303
		SE	0.00736737				SE	0.00891005				SE	0.0102797				21	0.0566
																	25	0.0512
	25 kHz	animal number	wave 4			25 kHz	animal number	wave 4			25 kHz	animal number	wave 4				30	0.0584
		9	0.1009				9	0.0682				9	0.0327				40	0.0251
		10	0.0902				10	0.0404				10	0.0498			40 kHz	9	0.0123
		17	0.1226				17	0.0898				17	0.0328				10	-0.0063
		21	0.0911				21	0.0324				21	0.0587				17	-0.0816
		25	0.1216				25	0.1438				25	-0.0222				21	0.0716
		30	0.125				30	0.1242				30	0.0008				25	0.0425
		40	0.0679				40	0.0201				40	0.0478				30	0.0447
		mean	0.102757				mean	0.0741286				mean	0.0286286				40	0.0515
		SD	0.0214304				SD	0.0473286				SD	0.0291891				mean	0.0242036
		SE	0.00809994				SE	0.0178885				SE	0.0110324				SD	0.0324195
																	SE	0.00433224
	30 kHz	animal number	wave 4			30 kHz	animal number	wave 4			30 kHz	animal number	wave 4
		9	0.0941				9	0.0585				9	0.0356
		10	0.0514				10	0.0597				10	-0.0083
		17	0.0899				17	0.083				17	0.0069
		21	0.0804				21	0.0501				21	0.0303
		25	0.0544				25	0.0351				25	0.0193
		30	0.11				30	0.0987				30	0.0113
		40	0.0688				40	0.0178				40	0.051
		mean	0.0784286				mean	0.0575571				mean	0.0208714
		SD	0.0215192				SD	0.0273439				SD	0.0198066
		SE	0.00813349				SE	0.010335				SE	0.0074862
	35 kHz	animal number	wave 4			35 kHz	animal number	wave 4			35 kHz	animal number	wave 4
		9	0.1003				9	0.0683				9	0.032
		10	0.091				10	0.0443				10	0.0467
		17	0.0963				17	0.066				17	0.0303
		21	0.0803				21	0.0237				21	0.0566
		25	0.0988				25	0.0476				25	0.0512
		30	0.1177				30	0.0593				30	0.0584
		40	0.0459				40	0.0208				40	0.0251
		mean	0.0900429				mean	0.0471429				mean	0.0429
		SD	0.0224737				SD	0.0191608				SD	0.013575
		SE	0.00849425				SE	0.0072421				SE	0.00513086
	40 kHz	animal number	wave 4			40 kHz	animal number	wave 4			40 kHz	animal number	wave 4
		9	0.0928				9	0.0805				9	0.0123
		10	0.0594				10	0.0657				10	-0.0063
		17	0.0269				17	0.1085				17	-0.0816
		21	0.0893				21	0.0177				21	0.0716
		25	0.077				25	0.0345				25	0.0425
		30	0.0907				30	0.046				30	0.0447
		40	0.0648				40	0.0133				40	0.0515
		mean	0.0715571				mean	0.0523143				mean	0.0192429
		SD	0.0236286				SD	0.0346601				SD	0.051382
		SE	0.00893076				SE	0.0131003				SE	0.0194206
		20min - pre					20min - post					20min - pre-post
		wave 4					wave 4					wave 4
		mean	SE				mean	SE				mean	SE
	5	0.0652143	0.00857367			5	0.0509714	0.0108774			5	0.0142429	0.00913413
	10	0.0814	0.0119971			10	0.065	0.0177217			10	0.0164	0.0134251
	15	0.0781143	0.0133803			15	0.0533	0.00828763			15	0.0248143	0.0181835
	20	0.0891	0.00736737			20	0.0625714	0.00891005			20	0.0265286	0.0102797
	25	0.102757	0.00809994			25	0.0741286	0.0178885			25	0.0286286	0.0110324
	30	0.0784286	0.00813349			30	0.0575571	0.010335			30	0.0208714	0.0074862
	35	0.0900429	0.00849425			35	0.0471429	0.0072421			35	0.0429	0.00513086
	40	0.0715571	0.00893076			40	0.0523143	0.0131003			40	0.0192429	0.0194206

## Sheet: 30 minutes - functions
Mouse ABR analysis - all amplitude slopes - 30 minutes
pre	5 kHz	animal number	wave 4		post	5 kHz	animal number	wave 4
		14	y = 0,064x - 0,9664				14	y = 0,0643x - 1,7064
		20	y = 0,0833x - 0,6474				20	y = 0,0086x + 0,6719
		84	y = 0,0063x + 0,7027				84	y = 0,0188x - 0,0767
		85	y = 0,0265x - 0,1976				85	y = 0,0601x - 1,9689
		86	y = 0,0658x - 0,7453				86	y = 0,0401x - 0,9213
	10 kHz	animal number	wave 4			10 kHz	animal number	wave 4
		14	y = 0,0669x - 1,3154				14	y = 0,1152x - 3,2989
		20	y = 0,073x + 0,1479				20	y = 0,0694x - 1,8408
		84	y = 0,0425x - 0,6483				84	y = 0,037x - 0,7988
		85	y = 0,0273x + 0,066				85	y = 0,1435x - 5,67
		86	y = 0,0367x + 0,8353				86	y = 0,0655x - 1,9625
	15 kHz	animal number	wave 4			15 kHz	animal number	wave 4
		14	y = 0,0374x + 0,4156				14	y = 0,0656x - 2,2979
		20	y = 0,0549x + 0,9948				20	y = 0,0712x - 1,4839
		84	y = 0,0398x - 0,0806				84	y = 0,0539x - 1,4007
		85	y = 0,0483x - 0,9421				85	y = 0,0687x - 2,0434
		86	y = 0,0588x - 0,02				86	y = 0,0703x - 1,9833
	20 kHz	animal number	wave 4			20 kHz	animal number	wave 4
		14	y = 0,0247x + 1,0915				14	y = 0,0309x - 0,4299
		20	y = 0,0895x + 0,6277				20	y = 0,0467x - 0,8563
		84	y = 0,0471x - 0,2966				84	y = 0,0302x - 0,5334
		85	y = 0,0195x + 0,6849				85	y = 0,1234x - 4,4141
		86	y = 0,0635x - 0,0093				86	y = 0,0665x - 1,8587
	25 kHz	animal number	wave 4			25 kHz	animal number	wave 4
		14	y = 0,0785x - 1,7098				14	y = 0,0648x - 2,2988
		20	y = 0,132x - 1,1979				20	y = 0,0578x - 1,3766
		84	y = 0,0538x - 1,0581				84	y = 0,0558x - 1,5204
		85	y = 0,0527x - 1,608				85	y = 0,0664x - 2,721
		86	y = 0,0801x - 1,725				86	y = 0,0576x - 1,802
	30 kHz	animal number	wave 4			30 kHz	animal number	wave 4
		14	y = 0,0825x - 1,7396				14	y = 0,0639x - 2,2013
		20	y = 0,1443x - 2,1998				20	y = 0,0351x - 0,6758
		84	y = 0,0363x - 0,3853				84	y = 0,016x + 0,0947
		85	y = 0,0479x - 1,02				85	y = 0,0167x - 0,0813
		86	y = 0,0846x - 1,2175				86	y = 0,0503x - 1,0606
	35 kHz	animal number	wave 4			35 kHz	animal number	wave 4
		14	y = 0,0447x - 0,2773				14	y = 0,0374x - 1,1285
		20	y = 0,1394x - 2,1689				20	y = 0,0229x - 0,206
		84	y = 0,0356x - 0,502				84	y = 0,0176x - 0,014
		85	y = 0,0285x - 0,6596				85	y = 0,0189x - 0,2668
		86	y = 0,0013x + 1,9895				86	y = 0,0625x - 1,9354
	40 kHz	animal number	wave 4			40 kHz	animal number	wave 4
		14	y = 0,0941x - 2,5864				14	y = 0,046x - 1,276
		20	y = 0,0921x - 1,4478				20	y = 0,0431x - 1,1728
		84	y = 0,0252x - 0,2347				84	y = 0,0102x - 0,088
		85	y = 0,0382x - 0,8659				85	y = 0,0084x + 0,1176
		86	y = 0,0864x - 1,8058				86	y = 0,0387x - 0,8497

## Sheet: 30 minutes - increase
Mouse ABR analysis - all amplitude slopes - 30 minutes
															pre-post
pre	5 kHz	animal number	wave 4		post	5 kHz	animal number	wave 4		pre-post	5 kHz	animal number	wave 4		total		animal number	wave 4
		14	0.064				14	0.0643				14	-0.0003			5 kHz	14	-0.0003
		20	0.0833				20	0.0086				20	0.0747				20	0.0747
		84	0.0063				84	0.0188				84	-0.0125				84	-0.0125
		85	0.0265				85	0.0601				85	-0.0336				85	-0.0336
		86	0.0658				86	0.0401				86	0.0257				86	0.0257
		mean	0.04918				mean	0.03838				mean	0.0108			10 kHz	14	-0.0483
		SD	0.0316745				SD	0.0245804				SD	0.0416614				20	0.0036
		SE	0.0141653				SE	0.0109927				SE	0.0186315				84	0.0055
																	85	-0.1162
	10 kHz	animal number	wave 4			10 kHz	animal number	wave 4			10 kHz	animal number	wave 4				86	-0.0288
		14	0.0669				14	0.1152				14	-0.0483			15 kHz	14	-0.0282
		20	0.073				20	0.0694				20	0.0036				20	-0.0163
		84	0.0425				84	0.037				84	0.0055				84	-0.0141
		85	0.0273				85	0.1435				85	-0.1162				85	-0.0204
		86	0.0367				86	0.0655				86	-0.0288				86	-0.0115
		mean	0.04928				mean	0.08612				mean	-0.03684			20 kHz	14	-0.0062
		SD	0.0197513				SD	0.04259				SD	0.0498047				20	0.0428
		SE	0.00883303				SE	0.0190468				SE	0.0222734				84	0.0169
																	85	-0.1039
	15 kHz	animal number	wave 4			15 kHz	animal number	wave 4			15 kHz	animal number	wave 4				86	-0.003
		14	0.0374				14	0.0656				14	-0.0282			25 kHz	14	0.0137
		20	0.0549				20	0.0712				20	-0.0163				20	0.0742
		84	0.0398				84	0.0539				84	-0.0141				84	-0.002
		85	0.0483				85	0.0687				85	-0.0204				85	-0.0137
		86	0.0588				86	0.0703				86	-0.0115				86	0.0225
		mean	0.04784				mean	0.06594				mean	-0.0181			30 kHz	14	0.0186
		SD	0.00927108				SD	0.00705996				SD	0.00652112				20	0.1092
		SE	0.00414615				SE	0.00315731				SE	0.00291633				84	0.0203
																	85	0.0312
	20 kHz	animal number	wave 4			20 kHz	animal number	wave 4			20 kHz	animal number	wave 4				86	0.0343
		14	0.0247				14	0.0309				14	-0.0062			35 kHz	14	0.0073
		20	0.0895				20	0.0467				20	0.0428				20	0.1165
		84	0.0471				84	0.0302				84	0.0169				84	0.018
		85	0.0195				85	0.1234				85	-0.1039				85	0.0096
		86	0.0635				86	0.0665				86	-0.003				86	-0.0612
		mean	0.04886				mean	0.05954				mean	-0.01068			40 kHz	14	0.0481
		SD	0.0287869				SD	0.0386409				SD	0.0556547				20	0.049
		SE	0.0128739				SE	0.0172808				SE	0.0248895				84	0.015
																	85	0.0298
	25 kHz	animal number	wave 4			25 kHz	animal number	wave 4			25 kHz	animal number	wave 4				86	0.0477
		14	0.0785				14	0.0648				14	0.0137				mean	0.00785
		20	0.132				20	0.0578				20	0.0742				SD	0.0463131
		84	0.0538				84	0.0558				84	-0.002				SE	0.00732274
		85	0.0527				85	0.0664				85	-0.0137
		86	0.0801				86	0.0576				86	0.0225
		mean	0.07942				mean	0.06048				mean	0.01894
		SD	0.0321571				SD	0.004772				SD	0.033903
		SE	0.0143811				SE	0.0021341				SE	0.0151619
	30 kHz	animal number	wave 4			30 kHz	animal number	wave 4			30 kHz	animal number	wave 4
		14	0.0825				14	0.0639				14	0.0186
		20	0.1443				20	0.0351				20	0.1092
		84	0.0363				84	0.016				84	0.0203
		85	0.0479				85	0.0167				85	0.0312
		86	0.0846				86	0.0503				86	0.0343
		mean	0.07912				mean	0.0364				mean	0.04272
		SD	0.0421252				SD	0.0209487				SD	0.0377744
		SE	0.018839				SE	0.00936856				SE	0.0168932
	35 kHz	animal number	wave 4			35 kHz	animal number	wave 4			35 kHz	animal number	wave 4
		14	0.0447				14	0.0374				14	0.0073
		20	0.1394				20	0.0229				20	0.1165
		84	0.0356				84	0.0176				84	0.018
		85	0.0285				85	0.0189				85	0.0096
		86	0.0013				86	0.0625				86	-0.0612
		mean	0.0499				mean	0.03186				mean	0.01804
		SD	0.0525873				SD	0.0188487				SD	0.0635609
		SE	0.0235178				SE	0.00842939				SE	0.0284253
	40 kHz	animal number	wave 4			40 kHz	animal number	wave 4			40 kHz	animal number	wave 4
		14	0.0941				14	0.046				14	0.0481
		20	0.0921				20	0.0431				20	0.049
		84	0.0252				84	0.0102				84	0.015
		85	0.0382				85	0.0084				85	0.0298
		86	0.0864				86	0.0387				86	0.0477
		mean	0.0672				mean	0.02928				mean	0.03792
		SD	0.0328529				SD	0.0184344				SD	0.0151105
		SE	0.0146923				SE	0.00824411				SE	0.00675762
		30min - pre					30min - post					30min - pre-post
		wave 4					wave 4					wave 4
		mean	SE				mean	SE				mean	SE
	5	0.04918	0.0141653			5	0.03838	0.0109927			5	0.0108	0.0186315
	10	0.04928	0.00883303			10	0.08612	0.0190468			10	-0.03684	0.0222734
	15	0.04784	0.00414615			15	0.06594	0.00315731			15	-0.0181	0.00291633
	20	0.04886	0.0128739			20	0.05954	0.0172808			20	-0.01068	0.0248895
	25	0.07942	0.0143811			25	0.06048	0.0021341			25	0.01894	0.0151619
	30	0.07912	0.018839			30	0.0364	0.00936856			30	0.04272	0.0168932
	35	0.0499	0.0235178			35	0.03186	0.00842939			35	0.01804	0.0284253
	40	0.0672	0.0146923			40	0.02928	0.00824411			40	0.03792	0.00675762

[truncated: 3 more sheets: 40 minutes - functions, 40 minutes - increase, complete]
