# Supplementary material for: Near-infrared-light pre-treatment attenuates noise-induced hearing loss in mice
Source: PeerJ. 2020 Jun 17;8:e9384. doi: 10.7717/peerj.9384 (PMC7305775; doi:10.7717/peerj.9384)
Supplement: Supplemental Information 3 — Missing cochlear hair cells per mm and cochlear length measurements. [file peerj-08-9384-s003.xlsx]

## Sheet: cell counting
Missing hair cell counting
	No loss of inner hair cells							Ear with NIR-laser attachement
								n.c. = not countable
	Loss of outer hair cells:
noise only
								noise only left			noise only right
name	side	apical	basal	total		total per animal		total left		mean	total right		mean
28	left	27	31	58
28	right	9	47	56		114
45	left	111	n.z.	111
45	right	10	118	128		239
55	left	21	171	192
55	right	63	102	165		357
62	left	15	72	87
62	right	25	66	91		178
66	left			133
66	right			134		267
67	left			53
67	right			136		189
73	left	23	46	69
73	right	0	60	60		129
83	left	23	46	107
83	right	0	60	117		224
	total:	327	819	1697		1697		810		101.25	887		110.875
with 5 min NIR-laser
								with 5 min NIR-laser left			with 5 min NIR-laser right
name	side	apical	basal	total		total per animal		total left		mean	total right		mean
52	left			72
52	right			72		144
60	left			127
60	right			135		262
64	left			148
64	right			178		326
68	left			70
68	right			76		146
70	left			124
70	right			157		281
71	left			139
71	right			122		261
78	left			141
78	right			122		263
82	left			99
82	right			60		159
	total:	0	0	1842		1842		920		115	922		115.25
with 10 min NIR-laser
								with 10 min NIR-laser left			with 10 min NIR-laser right
name	side	apical	basal	total		total per animal		total left		mean	total right		mean
38	left	63	16	79
38	right	41	93	134		213
50	left	9	82	91
50	right	5	40	45		136
56	left	18	34	52
56	right	39	37	76		128
58	left	50	61	111
58	right	31	79	110		221
63	left	4	77	81
63	right	33	45	78		159
72	left			110
72	right			78		188
76	left			91
76	right			110		201
80	left			112
80	right			89		201
	total:	293	564	1447		1447		727		90.875	720		90
with 20 min NIR-laser
								with 20 min NIR-laser left			with 20 min NIR-laser right
name	side	apical	basal	total		total per animal		total left		mean	total right		mean
9	left			79
9	right			78		157
10	left			110
10	right			86		196
17	left			68
17	right			51		119
21	left			81
21	right			63		144
25	left			77
25	right			44		121
30	left			127
30	right			123		250
40	left			139
40	right			105		244
	total:	0	0	1231		1231		681		97.2857	550		78.5714
with 30 min NIR-laser
								with 30 min NIR-laser left			with 30 min NIR-laser right
name	side	apical	basal	total		total per animal		total left		mean	total right		mean
19	left			91
19	right			72		163
8	left			83
8	right			93		176
14	left			54
14	right			88		142
18	left			28
18	right			73		101
20	left			96
20	right			95		191
84	left			45
84	right			43		88
85	left			49
85	right			43		92
86	left			124
86	right			173		297
	total:	0	0	1250		1250		570		71.25	680		85
with 40 min NIR-laser
								with 40 min NIR-laser left			with 40 min NIR-laser right
name	side	apical	basal	total		total per animal		total left		mean	total right		mean
15	left			141
15	right			124		265
16	left			92
16	right			116		208
22	left			136
22	right			64		200
31	left			87
31	right			115		202
32	left			128
32	right			95		223
36	left			114
36	right			82		196
46	left			102
46	right			101		203
48	left			89
48	right			116		205
	total:	0	0	1702		1702		889		111.125	813		101.625
control
								control left			control right
name	side	apical	basal	total		total per animal		total left		mean	total right		mean
49	left			96
49	right			78		174
50	left			50
50	right			42		92
51	left			95
51	right			59		154
53	left			74
53	right			56		130
54	left			116
54	right			71		187
55	left			62
55	right			64		126
56	left			85
56	right			80		165
	total:	0	0	1028		1028		578		82.5714	450		64.2857

## Sheet: length measurement
Length measurement of the counted cochlear fragments - laser experiment mouse 2015/16
photographed with Canon EOS 1000D																					photographed with AxioCam ICc1
Specification of total length in pixels				- Areas without missing hair cells																	Specification of total length in pixels				- Areas without missing hair cells
Length of object micrometer 1 mm:			2808	1	mm																Length of object micrometer 1 mm:			1073	1	mm
Length of object micrometer 10 µm:			28																		Length of object micrometer 10 µm:			12
noise only:	28	left	right		45	left	right		55	left	right		62	left	right		73	left	right		66	left	right		67	left	right		83	left	right
	1	3343.2	884.932		1	4457.42	2433.7		1	4596.75	505.253		1	2505.6	4659.26		1	2059.79	4734.77		1	753.238	568.683		1	1521.14	894.543		1	317.031	1240.85
	2	4126.15	-		2	-	1855.75		2	3244.21	4686.85		2	1726.65	5325.03		2	2205.96	5299.16		2	1292.7	1264.8		2	278.285	166.036		2	1623.43	676.057
	3	-	3830.82		3	4854.08	4273.57		3	4125.28	4033.99		3	2323.58	-		3	5992.77	-		3	1863.07	461.312		3	-	1625.96		3	277.394	641.285
	4	4336.85	2160.55		4	-	-		4	2453.82	3820.82		4	1141.35	-		4	4950.97	-		4	1409.6	1951.42		4	-	1127.98		4	833.813	866.089
	5	-	-		5	-	-		5	-	917.336		5	1124.61	-		5	423.45	-		5	-	797.427		5	-	369.772		5	707.293	1148.26
	6	-	4552.86		6	-	-		6	-	917.84		6	-	-		6	-	-		6	-	1006.16		6	-	-		6	1850.08	756.266
	7	-	-		7	-	-		7	-	-		7	-	-		7	-	-		7	-	-		7	-	-		7	-	-
	8	-	-		8	-	-		8	-	-		8	-	-		8	-	-		8	-	-		8	-	-		8	-	-
	total length	11806.2	11429.2		total length	9311.5	8563.02		total length	14420.1	14882.1		total length	8821.79	9984.29		total length	15632.9	10033.9		total length	5318.61	6049.8		total length	1799.42	4184.28		total length	5609.05	5328.8
	in mm:	4.20449	4.07022		in mm:	3.31606	3.04951		in mm:	5.13535	5.29989		in mm:	3.14166	3.55566		in mm:	5.56729	3.57334		in mm:	4.95676	5.63821		in mm:	1.677	3.89961		in mm:	5.22744	4.96626
5 minutes:	52	left	right		64	left	right		68	left	right		71	left	right		78	left	right		60	left	right		70	left	right		82	left	right
	1	1741.61	2336.88		1	2288.17	2766.13		1	4073.36	1717.13		1	1452.13	1338.78		1	322.27	689.192		1	376.867	894.224		1	435.323	299.582		1	501.981	258.784
	2	3511.11	453.845		2	294.266	1081.41		2	637.159	837.493		2	507.959	3340.35		2	1707.61	3205.95		2	1764.12	222.585		2	721.983	966.856		2	226.573	952.16
	3	1462.17	3316.02		3	4034.04	4362.97		3	1372.11	3988.89		3	469.439	3067.04		3	3581.7	1254.61		3	1101.32	709.976		3	1012.31	1057.47		3	376.162	748.589
	4	3638.41	1831.31		4	2417.35	2827.03		4	3753.11	4311.79		4	2948.47	2837.64		4	1239.56	930.945		4	817.36	1185.11		4	1499.44	978.378		4	339.65	1401.93
	5	-	-		5	4251.69	1691.08		5	1733.18	1836.82		5	5528.69	1692.02		5	3876.81	4197.06		5	-	287.854		5	632.934	696.786		5	1573.46	434.397
	6	-	-		6	-	-		6	-	-		6	-	-		6	4065.68	878.443		6	-	466.59		6	660.814	863.592		6	478.918	-
	7	-	-		7	-	-		7	-	-		7	-	-		7	862.394	365.189		7	-	1220.56		7	-	415.264		7	454.035	-
	8	-	-		8	-	-		8	-	-		8	-	-		8	-	1644.83		8	-	-		8	-	281.887		8	382.477	-
	9	-	-		9	-	-		9	-	-		9	-	-		9	-	-		9	-	-		9	-	-		9	277.171	-
	total length	10353.3	7938.06		total length	13285.5	12728.6		total length	11568.9	12692.1		total length	10906.7	12275.8		total length	15656	13166.2		total length	4059.67	4986.89		total length	4962.81	5559.81		total length	4610.43	3795.86
	in mm:	3.68708	2.82695		in mm:	4.73131	4.53298		in mm:	4.11998	4.51999		in mm:	3.88415	4.37173		in mm:	5.57551	4.68882		in mm:	3.78347	4.64762		in mm:	4.62517	5.18156		in mm:	4.29677	3.53762
10 minutes:	38	left	right		50	left	right		56	left	right		58	left	right		63	left	right		72	left	right		76	left	right		80	left	right
	1	4229.93	3361.23		1	3350.77	2349.41		1	1491.07	3787.21		1	3832.18	1729.09		1	2443.81	-		1	742.349	802.006		1	140.125	434.421		1	270.287	2043.63
	2	5049.85	3593.9		2	4151.53	4572.01		2	3201.84	5051.93		2	3654.89	3487.03		2	1482.8	-		2	951.653	595.159		2	1393.16	1122.07		2	538.708	1256.83
	3	-	2586.47		3	3292.01	-		3	2143.99	4193.76		3	4802.1	5147.51		3	455.623	2752.87		3	840.008	671.51		3	1767.26	1888.33		3	1074.62	986.073
	4	-	1227.06		4	1657.06	-		4	1033.3	1770.67		4	-	2209.3		4	3506	4047.71		4	347.964	860.483		4	1114.76	-		4	1602.1	1259.69
	5	-	-		5	-	-		5	2485.59	-		5	-	-		5	4602.52	4260.36		5	912.434	505.77		5	263.006	1040.46		5	695.158	-
	6	-	-		6	-	-		6	1629.3	-		6	-	-		6	2013.84	-		6	-	546.86		6	-	-		6	229.536	-
	7	-	-		7	-	-		7	-	-		7	-	-		7	-	-		7	-	-		7	-	-		7	181.904	-
	8	-	-		8	-	-		8	-	-		8	-	-		8	-	-		8	-	-		8	-	-		8	-	-
	total length	9279.78	10768.7		total length	12451.4	6921.43		total length	11985.1	14803.6		total length	12289.2	12572.9		total length	14504.6	11060.9		total length	3794.41	3981.79		total length	4678.3	4485.28		total length	4592.32	5546.22
	in mm:	3.30476	3.83499		in mm:	4.43425	2.4649		in mm:	4.26819	5.27192		in mm:	4.37648	4.47754		in mm:	5.16545	3.93908		in mm:	3.53626	3.71089		in mm:	4.36002	4.18013		in mm:	4.27988	5.16889
20 minutes:	9	left	right		10	left	right		17	left	right		25	left	right		40	left	right		21	left	right		30	left	right
	1	-	4245.11		1	2668.96	1624.79		1	864.269	2674.26		1	2338.8	393.21		1	1107.86	1133.34		1	450.048	340.685		1	679.792	80.038
	2	3262.8	3870.55		2	3505.17	2561.28		2	1144.4	4839.66		2	3875	4190.37		2	2274.22	1847.77		2	1087.25	3015.66		2	1693.88	969.817
	3	2443.6	1530.58		3	1825.8	3300.33		3	3858.32	589.496		3	1049.9	2396		3	3506.89	791.23		3	777.198	34.176		3	502.442	940.41
	4	2557.06	1780.73		4	1184.69	4698.83		4	2226.2	439.163		4	2114.52	2722.13		4	3361.78	2115.16		4	248.872	663.375		4	1298.99	976.959
	5	1643.61	-		5	1912.74	1235.82		5	1045.95	1338.52		5	-	-		5	810.564	2712.06		5	667.805	243.79		5	909.986	1808.06
	6	-	-		6	1694.53	-		6	-	-		6	-	-		6	2403.3	965.011		6	1132.14	-		6	-	-
	7	-	-		7	742.102	-		7	-	-		7	-	-		7	-	1743.61		7	-	-		7	-	-
	8	-	-		8	-	-		8	-	-		8	-	-		8	-	452.472		8	-	-		8	-	-
	total length	9907.07	11427		total length	13534	13421		total length	9139.15	9881.1		total length	9378.21	9701.72		total length	13464.6	11760.6		total length	4363.31	4297.69		total length	5085.08	4775.29
	in mm:	3.52816	4.06944		in mm:	4.8198	4.77957		in mm:	3.25468	3.51891		in mm:	3.33982	3.45503		in mm:	4.79509	4.18826		in mm:	4.06646	3.71089		in mm:	4.73913	4.45041
30 minutes:	19(a)	left	right		14	left	right		20	left	right		84	left	right		85	left	right		8	left	right		18	left	right		86	left	right
	1	3116.63	2712.78		1	2114.23	3093.41		1	1058.43	487.688		1	4369.22	3189.33		1	3184.36	3878.11		1	706.136	567.937		1	954.931	1130.95		1	2087.37	762.532
	2	217.745	2016.83		2	1390.77	4115.45		2	378.63	2141.55		2	2005.09	4270.18		2	3795.26	1861.77		2	384.295	366.523		2	817.458	1220.48		2	917.678	1089.79
	3	3010.71	3316.03		3	2623.51	2668.16		3	3756.39	3231.86		3	705.572	2334.8		3	2962.48	2827.94		3	343.688	607.209		3	345.569	2939.47		3	-	568.978
	4	4248.38	3752.29		4	739.102	4558.32		4	3040	3009.98		4	1325.7	746.902		4	-	-		4	1030.6	1029.61		4	1090.56	-		4	-	2378.13
	5	1701.1	-		5	3790.77	-		5	2683.26	1317.52		5	383.976	2187.72		5	-	-		5	1897.91	664.21		5	140.875	-		5	-	1142.19
	6	-	-		6	-	-		6	1024.38	-		6	2213.93	1162.14		6	-	-		6	-	1453.46		6	-	-		6	-	-
	7	-	-		7	-	-		7	-	932.915		7	2388.28	-		7	-	-		7	-	-		7	-	-		7	-	-
	8	-	-		8	-	-		8	-	-		8	-	-		8	-	-		8	-	-		8	-	-		8	-	-
	total length	12294.6	11797.9		total length	10658.4	14435.3		total length	11941.1	11121.5		total length	13391.8	13891.1		total length	9942.1	8567.81		total length	4362.63	4688.95		total length	3349.39	5290.9		total length	3005.05	5941.62
	in mm:	4.3784	4.20154		in mm:	3.79572	5.14079		in mm:	4.25252	3.96065		in mm:	4.76915	4.94696		in mm:	3.54063	3.05122		in mm:	4.06582	4.36995		in mm:	3.12152	4.93095		in mm:	2.8006	5.53739
40 minutes:	15	left	right		22	left	right		32	left	right		36	left	right		48	left	right		16	left	right		31	left	right		46	left	right
	1	3237.73	3385.95		1	2416.02	2627.43		1	1997.03	3383.86		1	3291.41	2989.53		1	4210.75	972.641		1	3114.28	171.472		1	1074.44	972.661		1	241.821	371.167
	2	876.868	4697.89		2	2895.25	1045.49		2	2910.3	1042.81		2	2615.37	3055.86		2	3181.51	2926.33		2	1159.69	558.618		2	1484.39	1498.77		2	652.047	1187.54
	3	2061.13	1923.95		3	4114.99	1385.25		3	2123.22	1256.58		3	2275.03	1484.95		3	538.545	1226.78		3	434.74	1760.99		3	534.241	678.065		3	94.092	2079.88
	4	1849.41	833.39		4	1077.46	1240.96		4	1466.7	1114.59		4	2008.5	2702.19		4	2533.01	4308.57		4	-	1111.61		4	690.734	2571.23		4	319.781	756.203
	5	411.625	-		5	4268.51	1575.85		5	1574.8	1350.07		5	-	-		5	-	2453.4		5	-	603.352		5	373.284	356.758		5	363.474	-
	6	2056.45	-		6	2321.24	-		6	1422.77	2229.61		6	-	-		6	-	-		6	-	502.433		6	-	-		6	457.851	-
	7	2322.93	-		7	-	-		7	1527.95	-		7	-	-		7	-	-		7	-	-		7	-	-		7	1567.83	-
	8	1945.99	-		8	-	-		8	-	-		8	-	-		8	-	-		8	-	-		8	-	-		8	1675.41	-
	total length	14762.1	10841.2		total length	17093.5	7874.98		total length	13022.8	10377.5		total length	10190.3	10232.5		total length	10463.8	11887.7		total length	4708.71	4708.47		total length	4157.09	6077.48		total length	5372.31	4394.78
	in mm:	5.25717	3.86082		in mm:	6.08742	2.80448		in mm:	4.63773	3.6957		in mm:	3.62902	3.64406		in mm:	3.72643	4.23352		in mm:	4.38836	4.38814		in mm:	3.87427	5.66401		in mm:	5.00681	4.09579
control:	49	left	right		50	left	right		51	left	right		53	left	right		54	left	right		55	left	right		56	left	right
	1	2518.95	231.016		1	317.519	879.194		1	2208.6	1079.39		1	991.958	1130.21		1	1159.07	472.934		1	752.6	718.909		1	739.169	827.461
	2	1341.65	1045.89		2	769.018	1615.1		2	1121.81	137.029		2	814.609	694.037		2	667.72	844.606		2	2126.09	546.985		2	950.33	504.678
	3	1348.47	667.607		3	1437.37	984.189		3	118.526	778.115		3	52.154	2540.41		3	121.79	447.211		3	384.98	301.69		3	826.929	530.271
	4	1404.93	1500.86		4	1448.21	2093.21		4	1126.72	2529.35		4	2005.81	433.141		4	317.349	1402.31		4	621.496	2105.63		4	662.255	818.05
	5	-	1335.42		5	206.146	407.159		5	1107.37	1115.07		5	1371.61	1058.04		5	1277.16	1461.57		5	955.839	678.07		5	127.937	399.127
	6	-	1610.11		6	1106.71	-		6	-	-		6	846.867	97.021		6	776.773	-		6	-	277.754		6	1418.74	718.995
	7	-	-		7	-	-		7	-	-		7	-	-		7	1270	-		7	-	73.028		7	-	868.842
	8	-	-		8	-	-		8	-	-		8	-	-		8	902.422	-		8	-	723.619		8	-	1056.88
	total length	6614	6390.91		total length	5284.98	5978.84		total length	5683.03	5638.95		total length	6083.01	5952.85		total length	6492.28	4628.64		total length	4841.01	5425.69		total length	4725.36	5724.3
	in mm:	6.16402	5.95611		in mm:	4.92542	5.57208		in mm:	5.2964	5.25532		in mm:	5.66916	5.54786		in mm:	6.05059	4.31373		in mm:	4.51166	5.05656		in mm:	4.40387	5.33486
noise only:		28		45		55		62		73		66		67		83		mean	SD	SE	mean	SD	SE
		left	right	left	right	left	right	left	right	left	right	left	right	left	right	left	right	left	left	left	right	right	right
	length / mm:	4.20449	4.07022	3.31606	3.04951	5.13535	5.29989	3.14166	3.55566	5.56729	3.57334	4.95676	5.63821	1.677	3.89961	5.22744	4.96626
	cell loss:	58	56	111	128	192	165	87	91	69	60	133	134	53	136	107	117
	cell loss per mm:	13.7948	13.7585	33.4734	41.974	37.3879	31.1327	27.6923	25.593	12.3938	16.791	26.832	23.7664	31.604	34.8753	20.4689	23.559	25.4559	9.12468	3.22606	26.4312	9.29338	3.2857
5 minutes:		52		64		68		71		78		60		70		82		mean	SD	SE	mean	SD	SE
		left	right	left	right	left	right	left	right	left	right	left	right	left	right	left	right	left	left	left	right	right	right
	length / mm:	3.68708	2.82695	4.73131	4.53298	4.11998	4.51999	3.88415	4.37173	5.57551	4.68882	3.78347	4.64762	4.62517	5.18156	4.29677	3.53762
	cell loss:	72	72	148	178	70	76	139	122	141	122	127	135	124	157	99	60
	cell loss per mm:	19.5277	25.4692	31.281	39.2677	16.9904	16.8142	35.7865	27.9066	25.2892	26.0193	33.567	29.0471	26.8098	30.2998	23.0406	16.9606	26.5365	6.67196	2.35889	26.4731	7.29013	2.57745
10 minutes:		38		50		56		58		63		72		76		80		mean	SD	SE	mean	SD	SE
		left	right	left	right	left	right	left	right	left	right	left	right	left	right	left	right	left	left	left	right	right	right
	length / mm:	3.30476	3.83499	4.43425	2.4649	4.26819	5.27192	4.37648	4.47754	5.16545	3.93908	3.53626	3.71089	4.36002	4.18013	4.27988	5.16889
	cell loss:	79	134	91	45	52	76	111	110	81	78	110	78	91	110	112	89
	cell loss per mm:	23.9049	34.9414	20.5221	18.2563	12.1831	14.416	25.3628	24.567	15.6811	19.8016	31.1063	21.0192	20.8715	26.315	26.1689	17.2184	21.9751	6.03554	2.13388	22.0669	6.46798	2.28678
20 minutes:		9		10		17		25		40		21		30				mean	SD	SE	mean	SD	SE
		left	right	left	right	left	right	left	right	left	right	left	right	left	right			left	left	left	right	right	right
	length / mm:	3.52816	4.06944	4.8198	4.77957	3.25468	3.51891	3.33982	3.45503	4.79509	4.18826	4.06646	3.71089	4.73913	4.45041
	cell loss:	79	78	110	86	68	51	77	44	139	105	81	63	127	123
	cell loss per mm:	22.3913	19.1673	22.8225	17.9932	20.893	14.4931	23.0551	12.7351	28.988	25.07	19.9191	16.977	26.7982	27.6379			23.5524	3.22704	1.21971	19.1534	5.41587	2.047
30 minutes:		19(a)		14		20		84		85		8		18		86		mean	SD	SE	mean	SD	SE
		left	right	left	right	left	right	left	right	left	right	left	right	left	right	left	right	left	left	left	right	right	right
	length / mm:	4.3784	4.20154	3.79572	5.14079	4.25252	3.96065	4.76915	4.94696	3.54063	3.05122	4.06582	4.36995	3.12152	4.93095	2.8006	5.53739
	cell loss:	91	72	54	88	96	95	45	43	49	43	83	93	28	73	124	173
	cell loss per mm:	20.7838	17.1366	14.2265	17.118	22.5748	23.9859	9.43564	8.69221	13.8393	14.0927	20.4141	21.2817	8.97	14.8045	44.2762	31.2421	19.315	11.3235	4.00345	18.5442	6.89951	2.43935
40 minutes:		15		22		32		36		48		16		31		46		mean	SD	SE	mean	SD	SE
		left	right	left	right	left	right	left	right	left	right	left	right	left	right	left	right	left	left	left	right	right	right
	length / mm:	5.25717	3.86082	6.08742	2.80448	4.63773	3.6957	3.62902	3.64406	3.72643	4.23352	4.38836	4.38814	3.87427	5.66401	5.00681	4.09579
	cell loss:	141	124	136	64	128	95	114	82	89	116	92	116	87	115	102	101
	cell loss per mm:	26.8205	32.1175	22.3412	22.8206	27.5997	25.7056	31.4134	22.5023	23.8835	27.4004	20.9645	26.4349	22.4558	20.3036	20.3722	24.6595	24.4814	3.80868	1.34657	25.2431	3.6187	1.2794
control		49		50		51		53		54		55		56				mean	SD	SE	mean	SD	SE
		left	right	left	right	left	right	left	right	left	right	left	right	left	right			left	left	left	right	right	right
	length / mm:	6.16402	5.95611	4.92542	5.57208	5.2964	5.25532	5.66916	5.54786	6.05059	4.31373	4.51166	5.05656	4.40387	5.33486
	cell loss:	96	78	50	42	95	59	74	56	116	71	62	64	85	80
	cell loss per mm:	15.5742	13.0958	10.1514	7.53758	17.9367	11.2267	13.0531	10.094	19.1717	16.4591	13.7422	12.6568	19.3012	14.9957			15.5615	3.45282	1.30504	12.2951	3.00067	1.13415
Mean value calculations from both ear sites:																		control - both sides
control:		49		50		51		53		54		55		56				mean	SD	SE
		left	right	left	right	left	right	left	right	left	right	left	right	left	right			both sides	both sides	both sides
	length / mm:	6.16402	5.95611	4.92542	5.57208	5.2964	5.25532	5.66916	5.54786	6.05059	4.31373	4.51166	5.05656	4.40387	5.33486
	cell loss:	96	78	50	42	95	59	74	56	116	71	62	64	85	80
	cell loss per mm:	15.5742	13.0958	10.1514	7.53758	17.9367	11.2267	13.0531	10.094	19.1717	16.4591	13.7422	12.6568	19.3012	14.9957			13.9283	3.53987	0.94607
																		noise only - both sides
noise only:		28		45		55		62		73		66		67		83		mean	SD	SE
		left	right	left	right	left	right	left	right	left	right	left	right	left	right	left	right	both sides	both sides	both sides
	length / mm:	4.20449	4.07022	3.31606	3.04951	5.13535	5.29989	3.14166	3.55566	5.56729	3.57334	4.95676	5.63821	1.677	3.89961	5.22744	4.96626
	cell loss:	58	56	111	128	192	165	87	91	69	60	133	134	53	136	107	117
	cell loss per mm:	13.7948	13.7585	33.4734	41.974	37.3879	31.1327	27.6923	25.593	12.3938	16.791	26.832	23.7664	31.604	34.8753	20.4689	23.559	25.9436	8.91138	2.22785
